# Supplementary material
Source: PubMed Central journal article supplement (PMC2049038)
Supplement: bj4060383add.pdf [file bj4060383add.pdf]

Supplementary data  
Figure S1

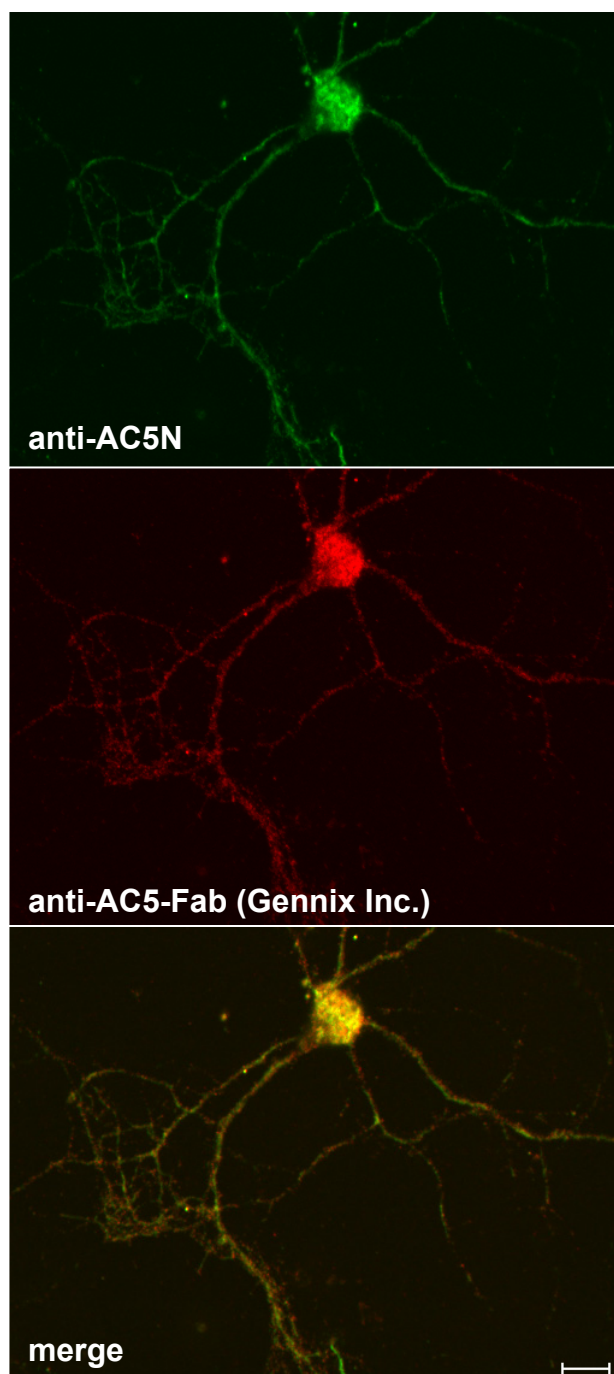

**Fig. S1. Expression of AC5 in primary striatal neurons.** Immunostaining of AC5 in striatal neurons (DIV=9) using the anti-AC5N antibody (green) and a commercially available AC5 antibody (anti-AC5-Fab, red). The merged signal (yellow) is shown in the bottom panel.

## Supplementary data Figure S2

**A**

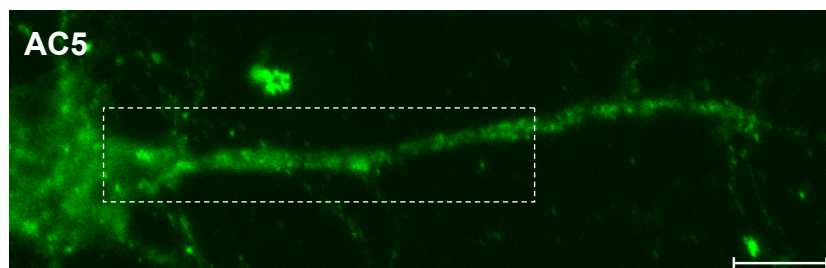

**B**

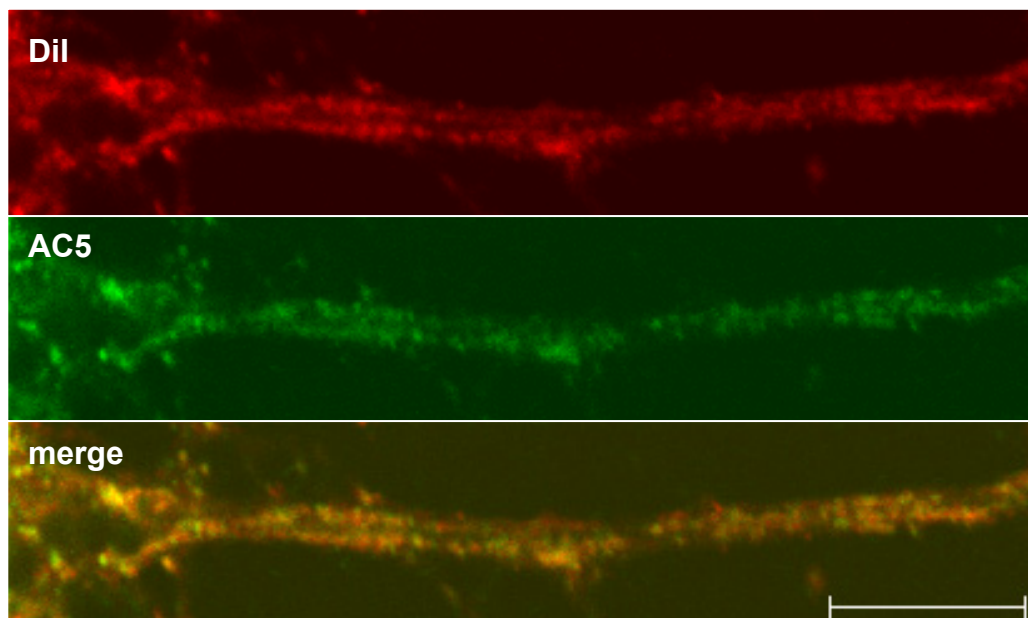

**Fig. S2. The presence of AC5 in the plasma membrane fraction and intracellular organelles of primary striatal neurons.** Double immunostaining of AC5 and Dil (a membrane-partitioning fluorescent dye, 4  $\mu$ g/ml) in primary striatal neurons (DIV= 9). AC5 was visualized by streptavidin Alexa Fluor® 488 (green). Dil is shown in red. The merged image (yellow) is shown in the bottom panel. High magnifications of the indicated region are shown in *B*. Scale bars are 10  $\mu$ m.

## Supplementary data

### Figure S3

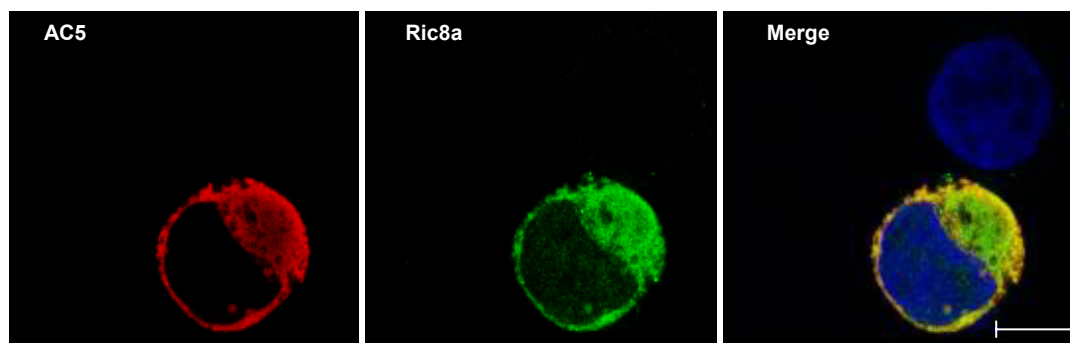

**Fig. S3. Colocalization of AC5 and Ric8a in HEK293 cells.** HEK293 cells were transfected with constructs encoding AC5<sub>myc</sub> and HA-Ric8a for 2 days. Expression of AC5 was visualized by an anti-Myc antibody and the Alexa Fluor® 568 secondary antibody (red). Ric8a was visualized using the anti-Ric8a antibody and the Alexa Fluor® 488 secondary antibody (green). Nuclear DNA was stained with DAPI and is shown in blue. The merged image (yellow) is shown in the right panel. The scale bar is 10  $\mu$ m.
